# Supplementary material for: A-Type Lamins Maintain the Positional Stability of DNA Damage Repair Foci in Mammalian Nuclei
Source: PubMed Central journal article supplement (PMC3642183; doi:10.1371/journal.pone.0061893), 2013-05-02

# Figure S2

GFP-lamin A (green) DAPI (DNA) (blue) PLA (Lamin-GFP interaction) (red)

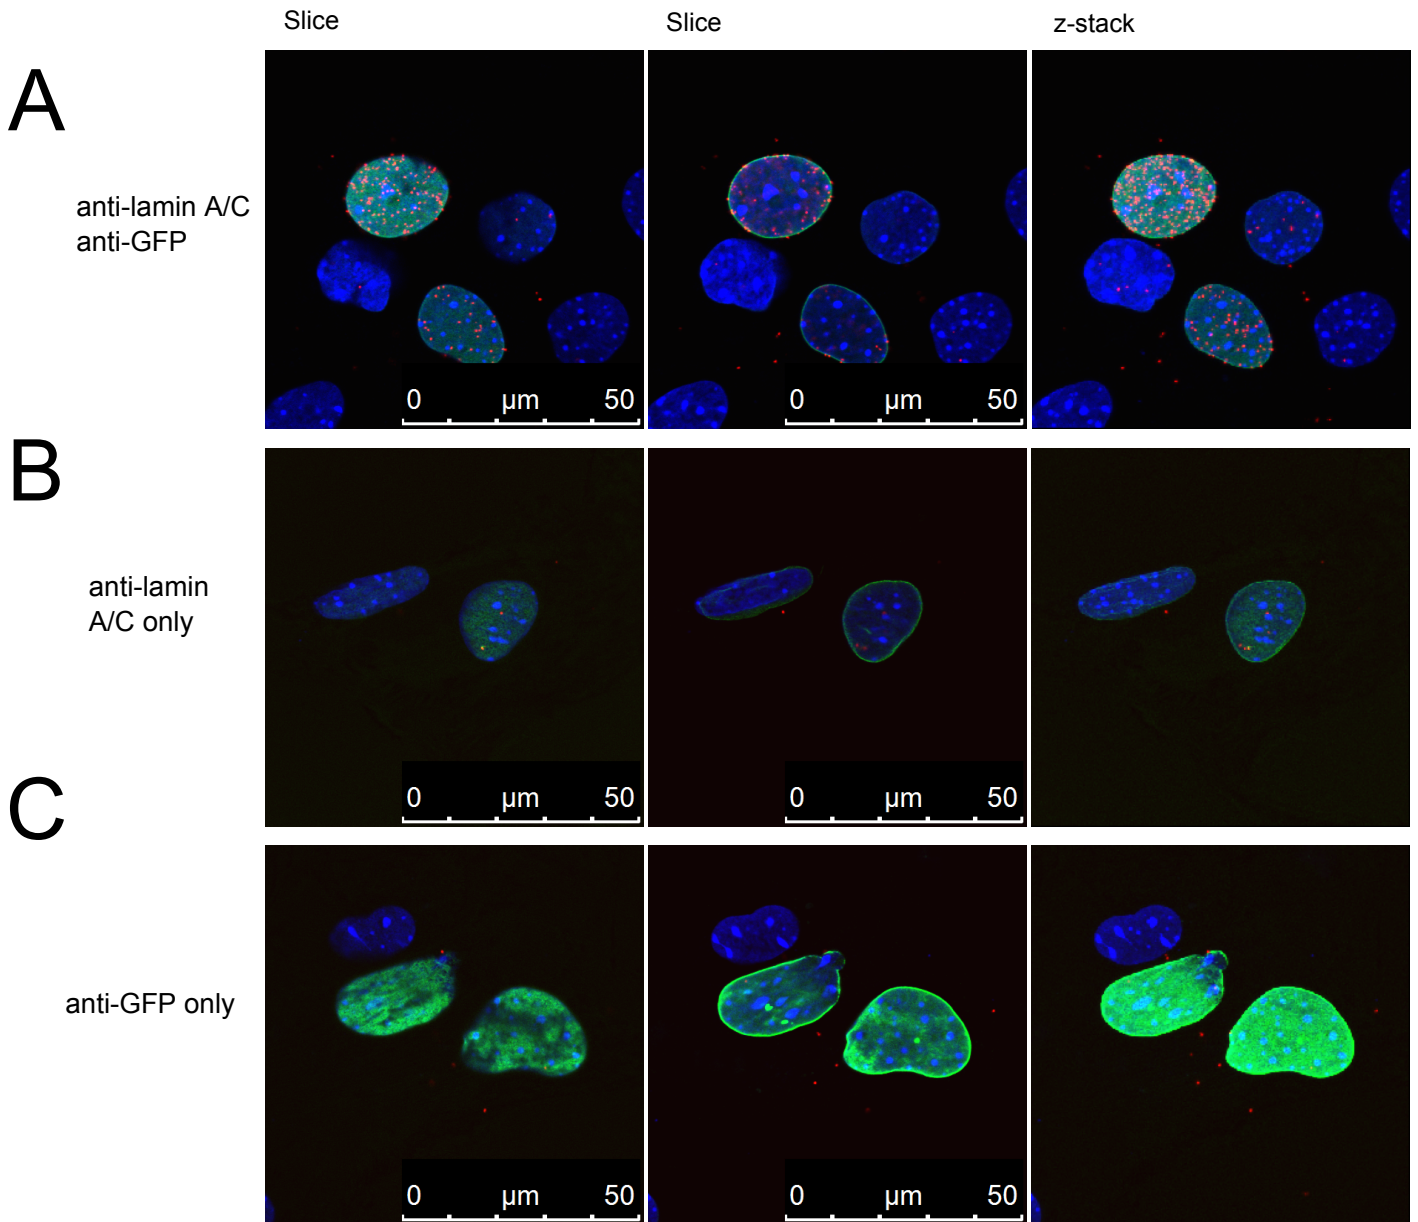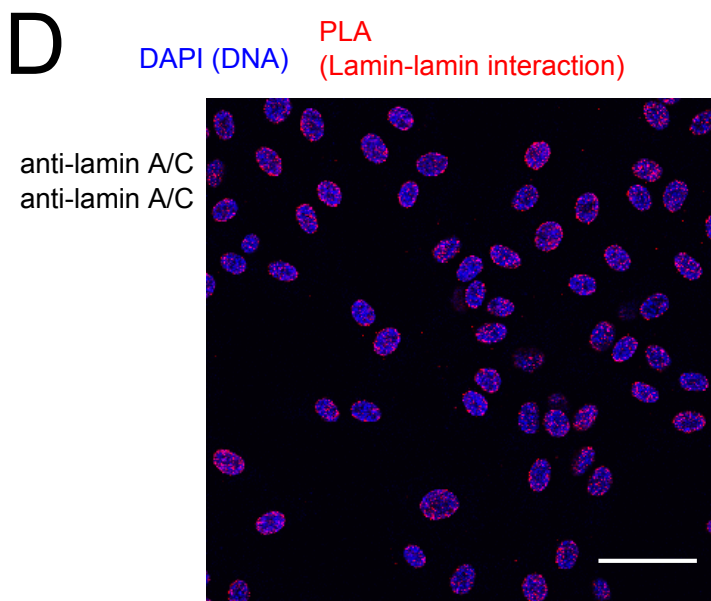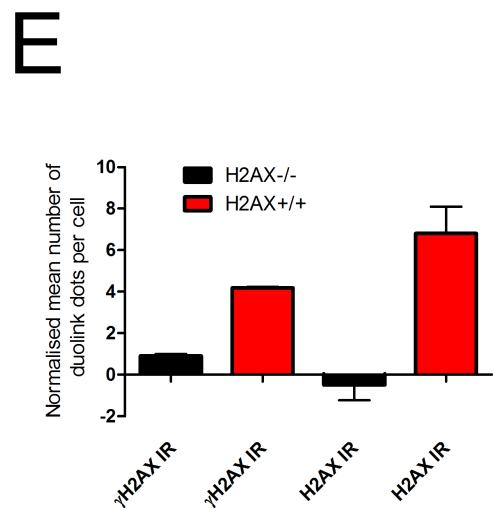

Supplement: pone.0061893.s002.pdf [file pone.0061893.s002.pdf]
